# Supplementary material for: Studies towards the total synthesis of lycoposerramine A. Synthesis of a model for the tetracyclic core
Source: Royal Society of Chemistry journal article supplement (doi:10.1039/b909860g), 2009-01-01

# Studies towards the total synthesis of lycoposerramine A. Synthesis of a model for the tetracyclic core

Mark C. Elliott and James S. Paine

*tert*-Butyl(((2*RS*,3*aSR*,7*aSR*)-2-(*tert*-butyldimethylsilyloxy)-2,3,3*a*,7*a*-tetrahydro-1*H*-inden-3*a*-yl)methoxy)dimethylsilane (**10**)

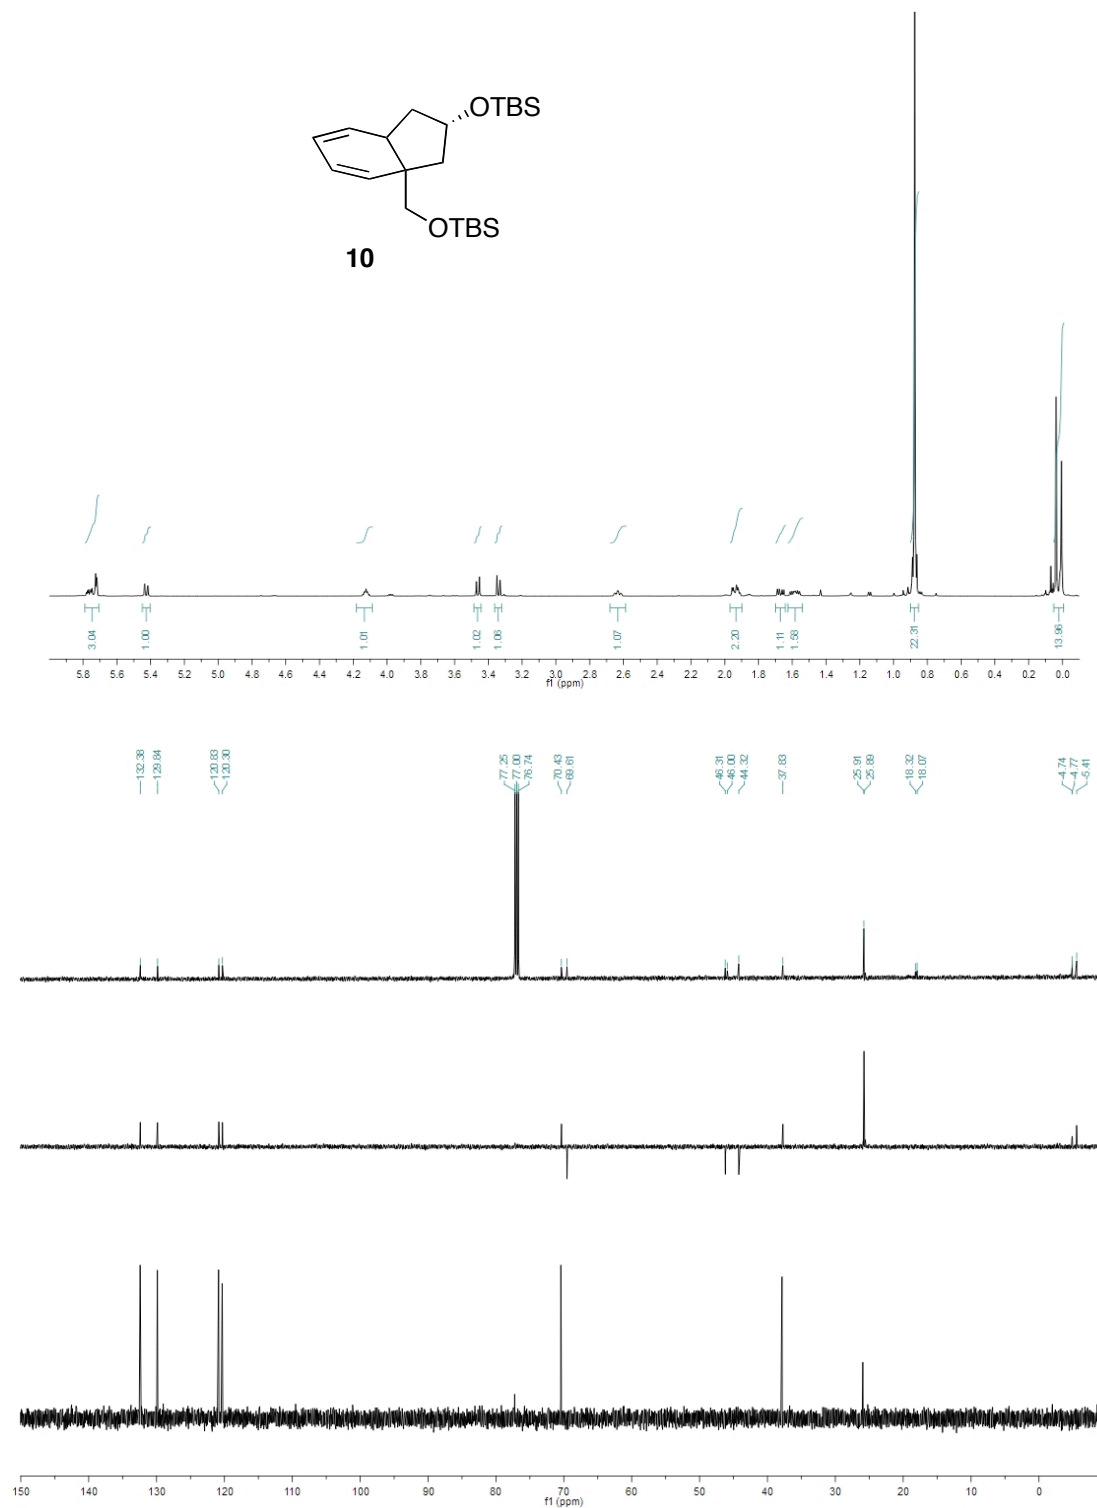

# $^1\text{H}$ - $^1\text{H}$ COSY NMR Spectrum

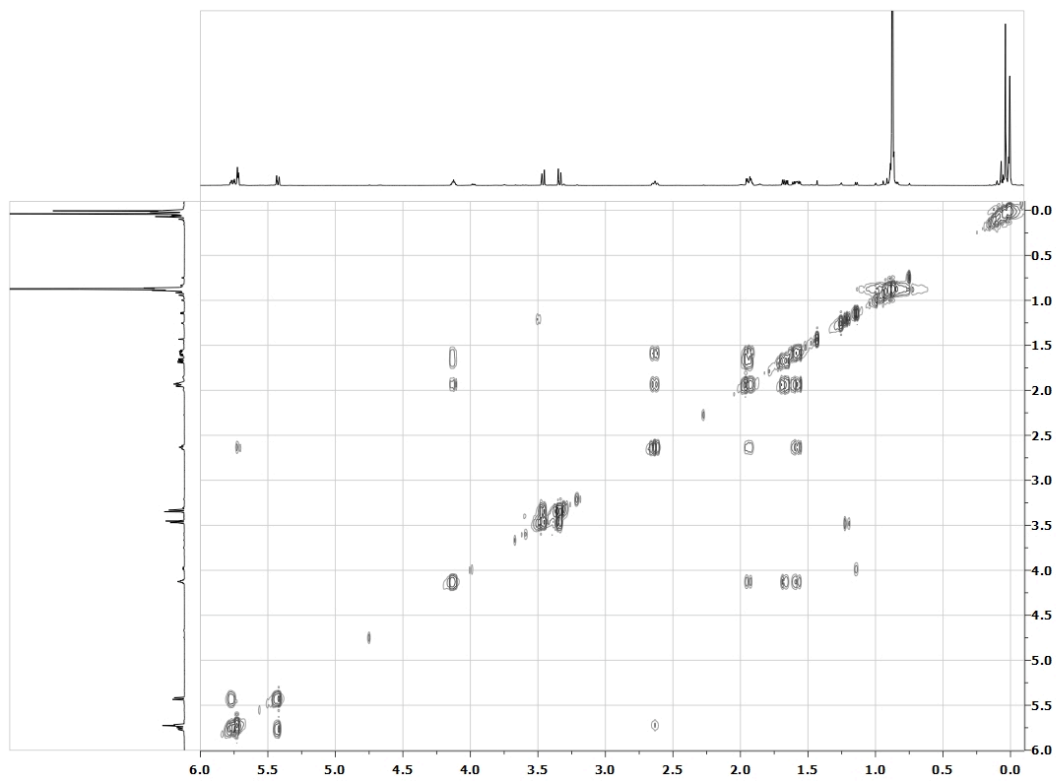

# Endoperoxide 11

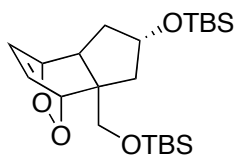

11

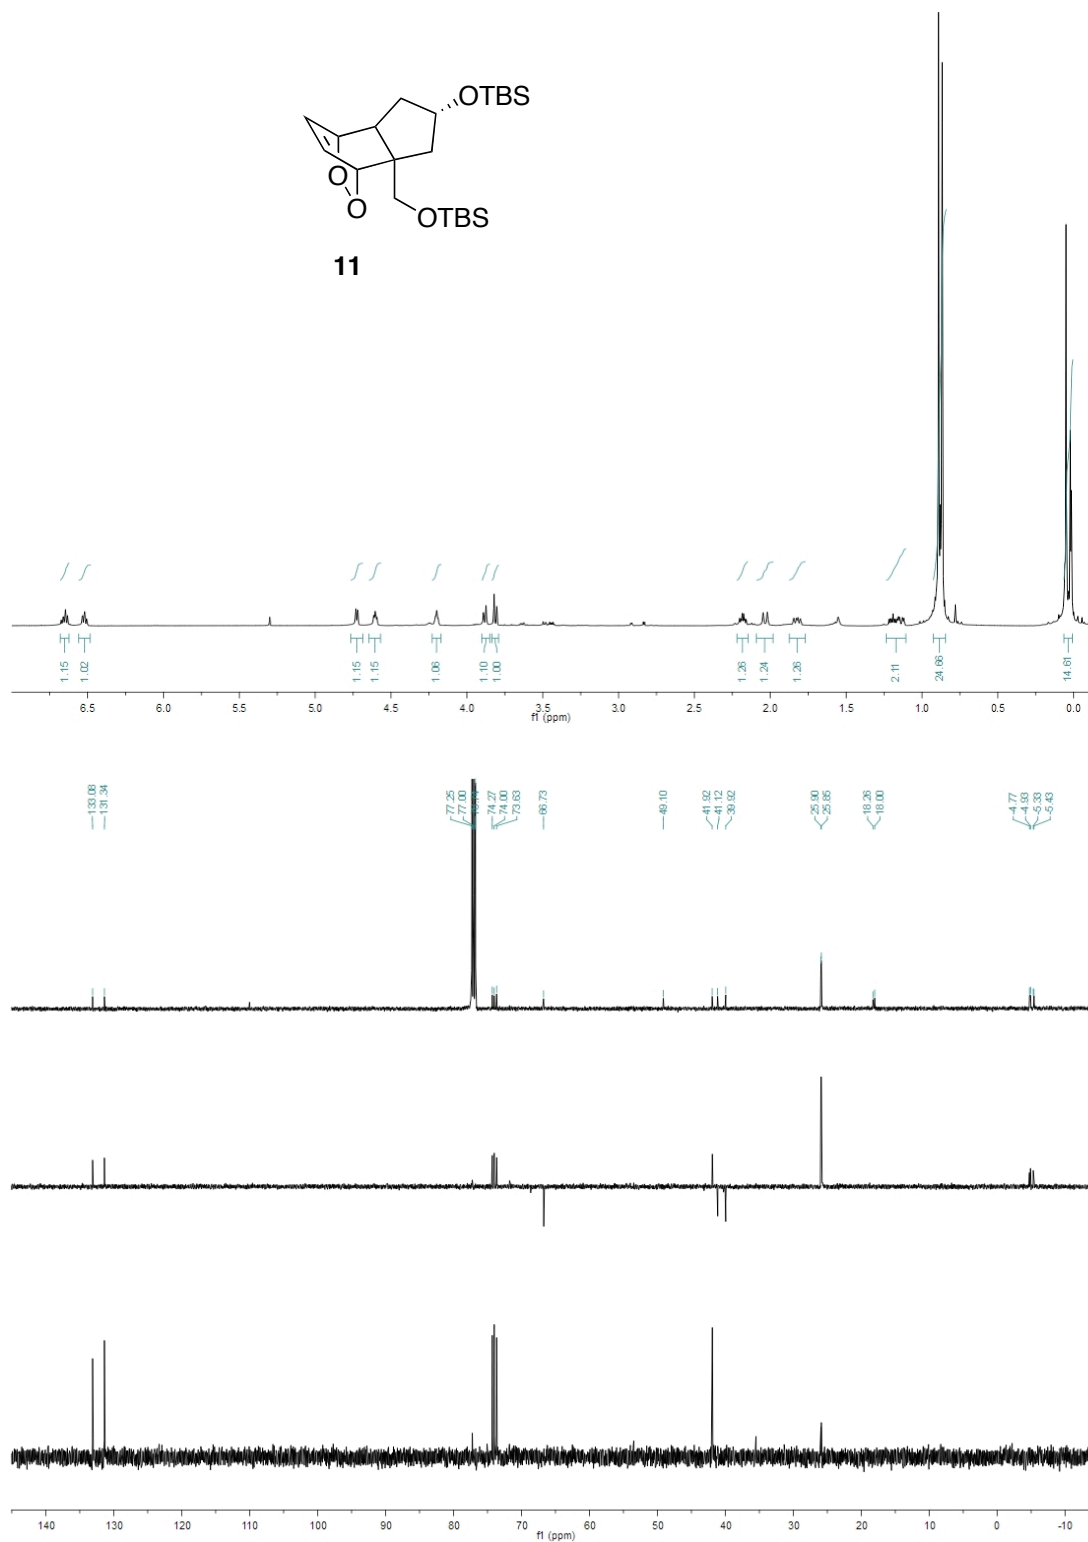

# Endoperoxide 12

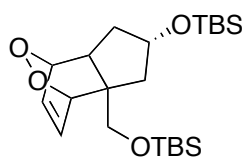

12

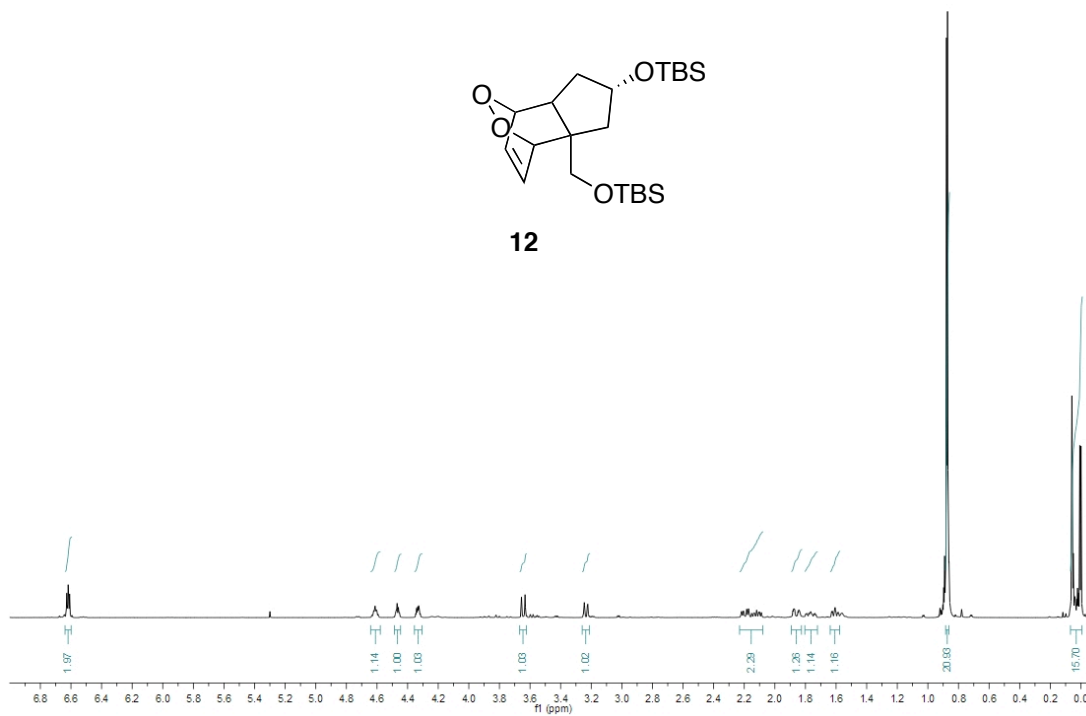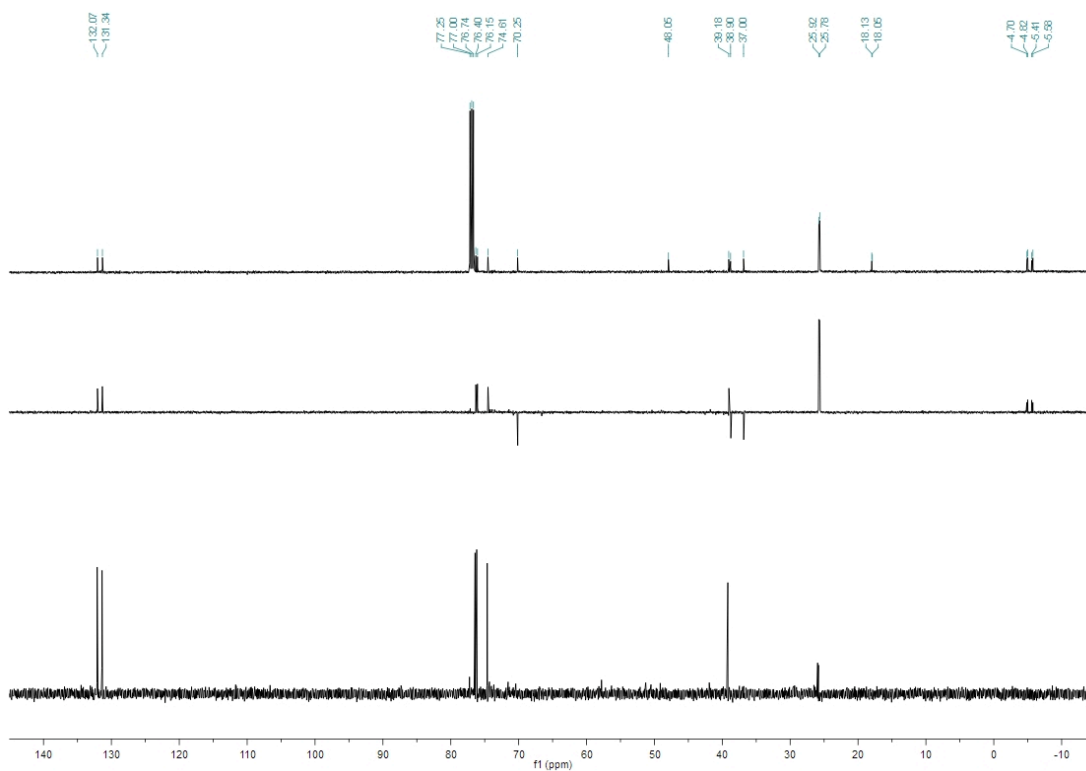

**(2*RS*,3*aRS*,7*SR*,7*aSR*)-2-(*tert*-Butyldimethylsilyloxy)-7*a*-((*tert*-butyldimethylsilyloxy)methyl)-7-hydroxy-3,3*a*,7,7*a*-tetrahydro-1*H*-inden-4(2*H*)-one (13)**

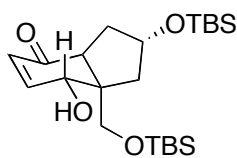

**13**

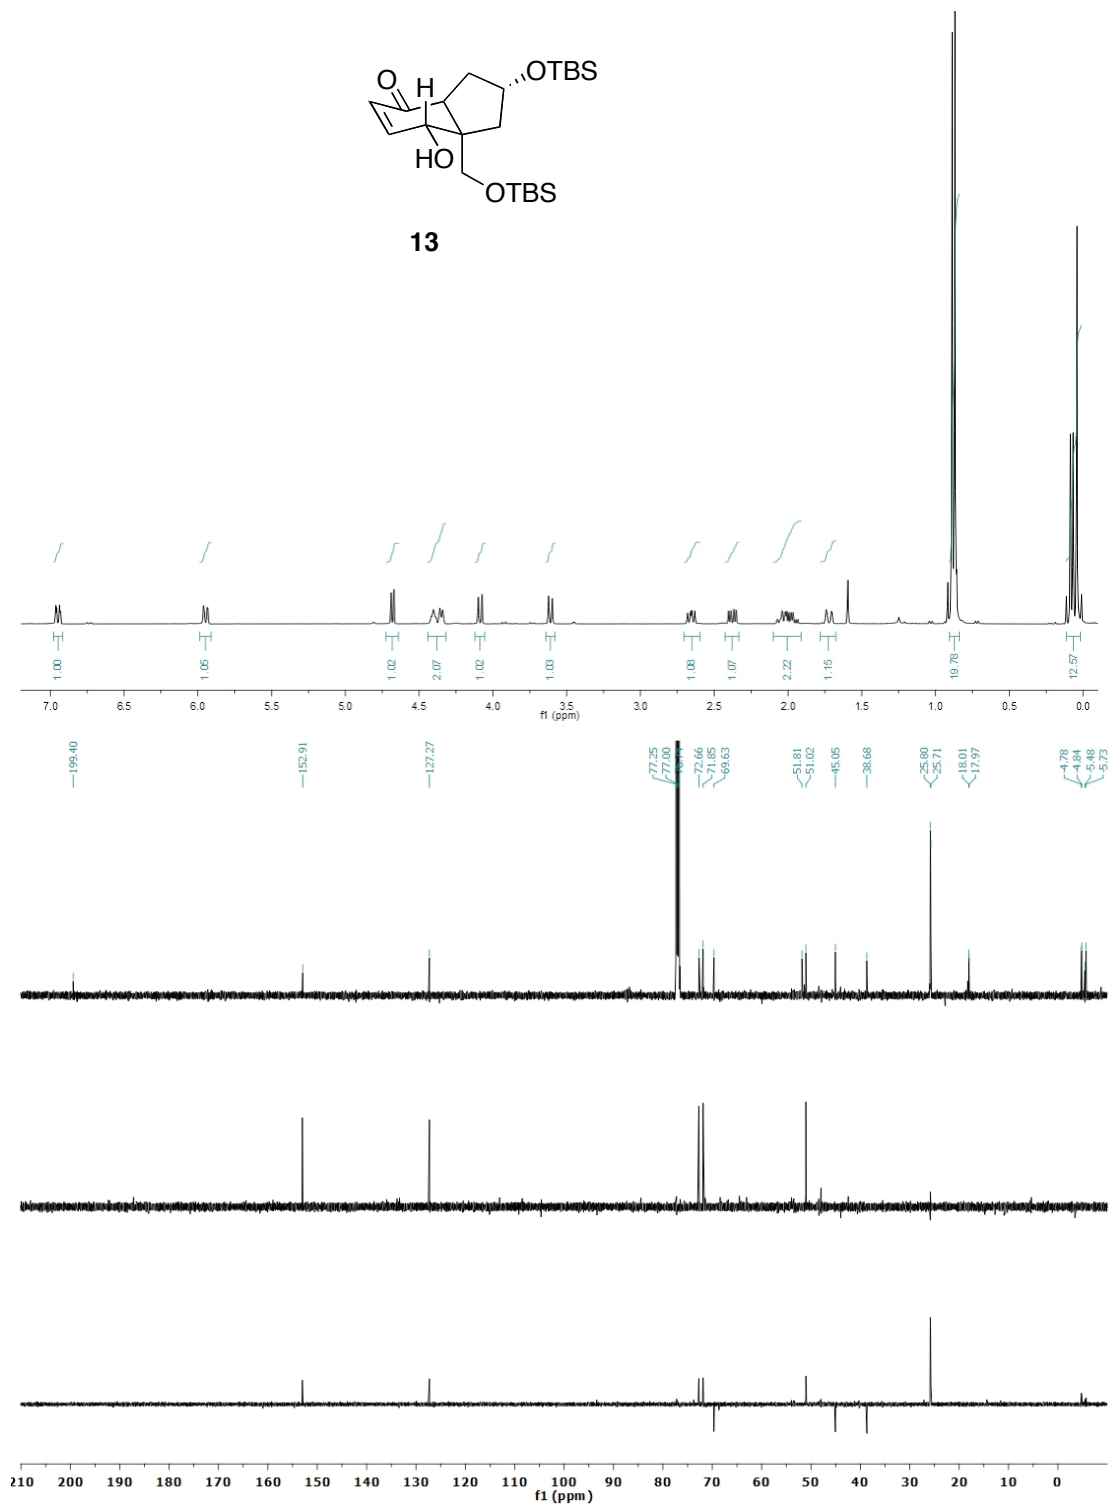

# $^1\text{H}$ - $^1\text{H}$ COSY NMR Spectrum

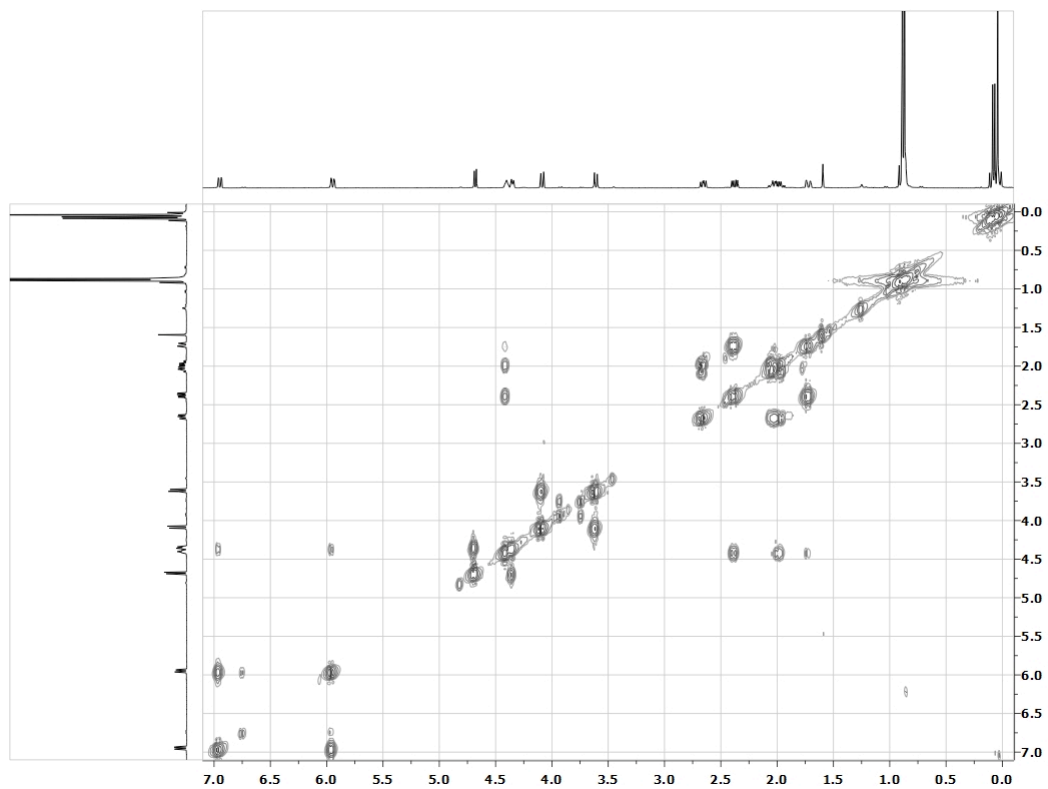

**(2*RS*,3*aRS*,7*RS*,7*aSR*)-2-(*tert*-butyldimethylsilyloxy)-7*a*-((*tert*-butyldimethylsilyloxy)methyl)-7-hydroxy-3,3*a*,7,7*a*-tetrahydro-1*H*-inden-4(2*H*)-one (14)**

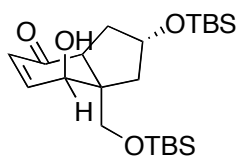

**14**

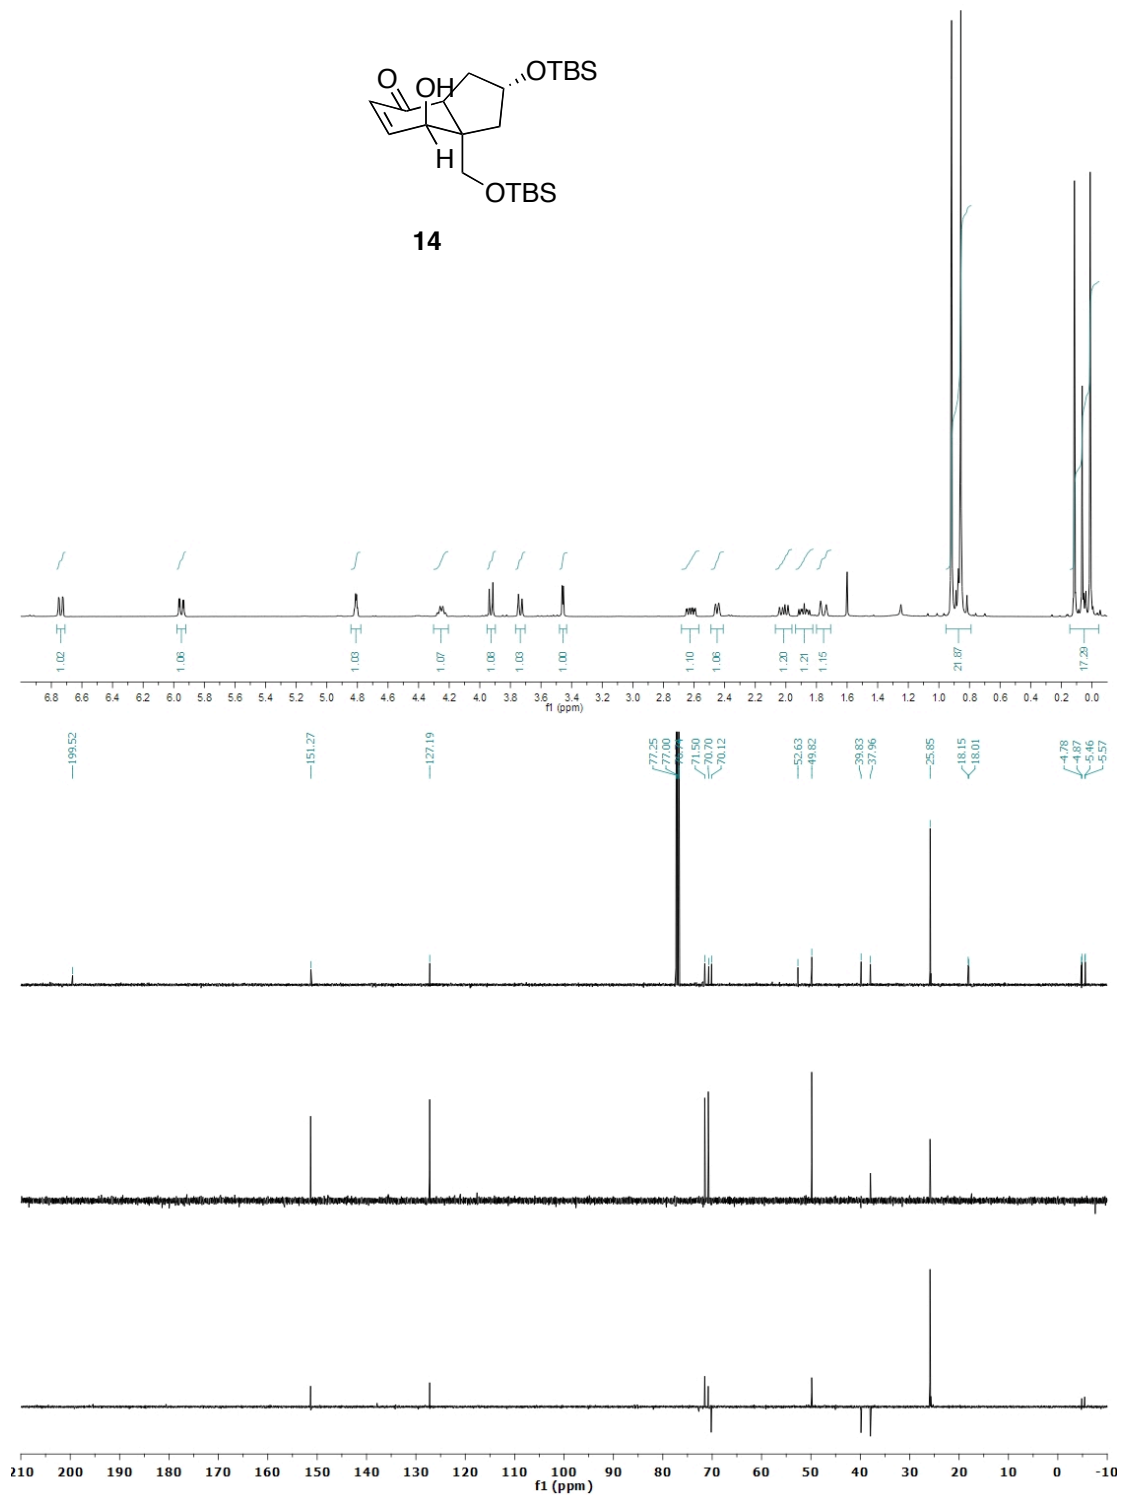

# $^1\text{H}$ - $^1\text{H}$ COSY NMR Spectrum

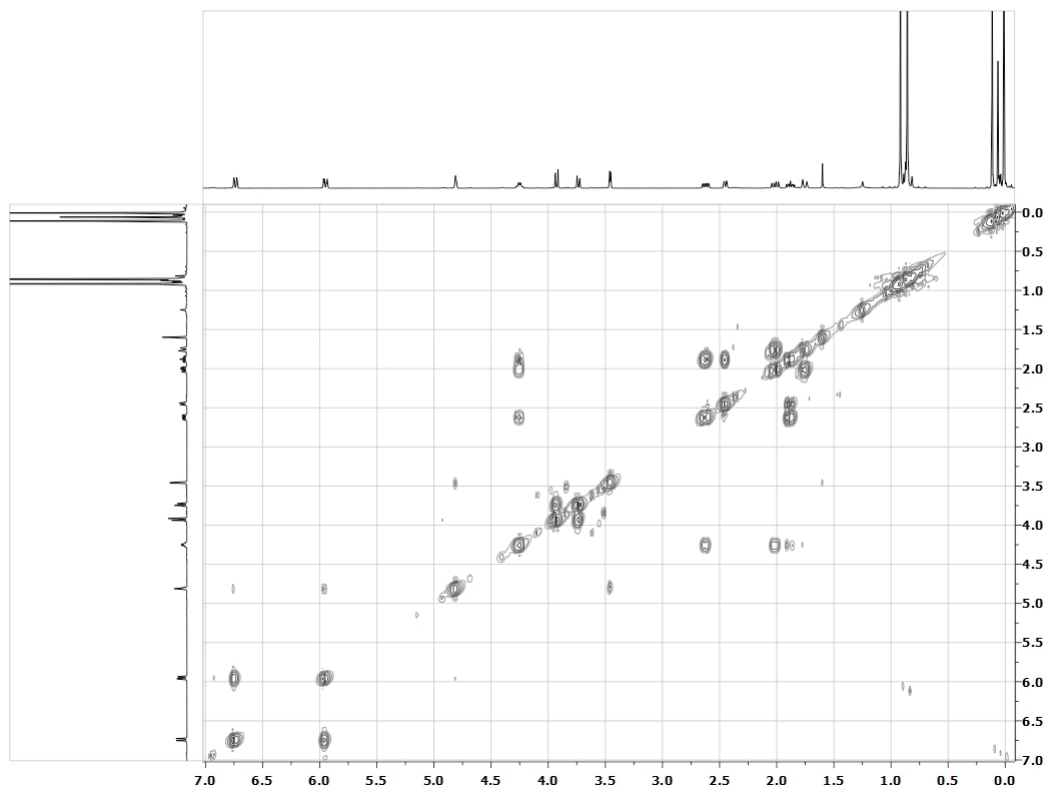



**(2SR,3aRS,7SR,7aSR)-2-(*tert*-Butyldimethylsilyloxy)-3a-((*tert*-butyldimethylsilyloxy)methyl)-7-hydroxyhexahydro-1*H*-inden-4(2*H*)-one (15)**

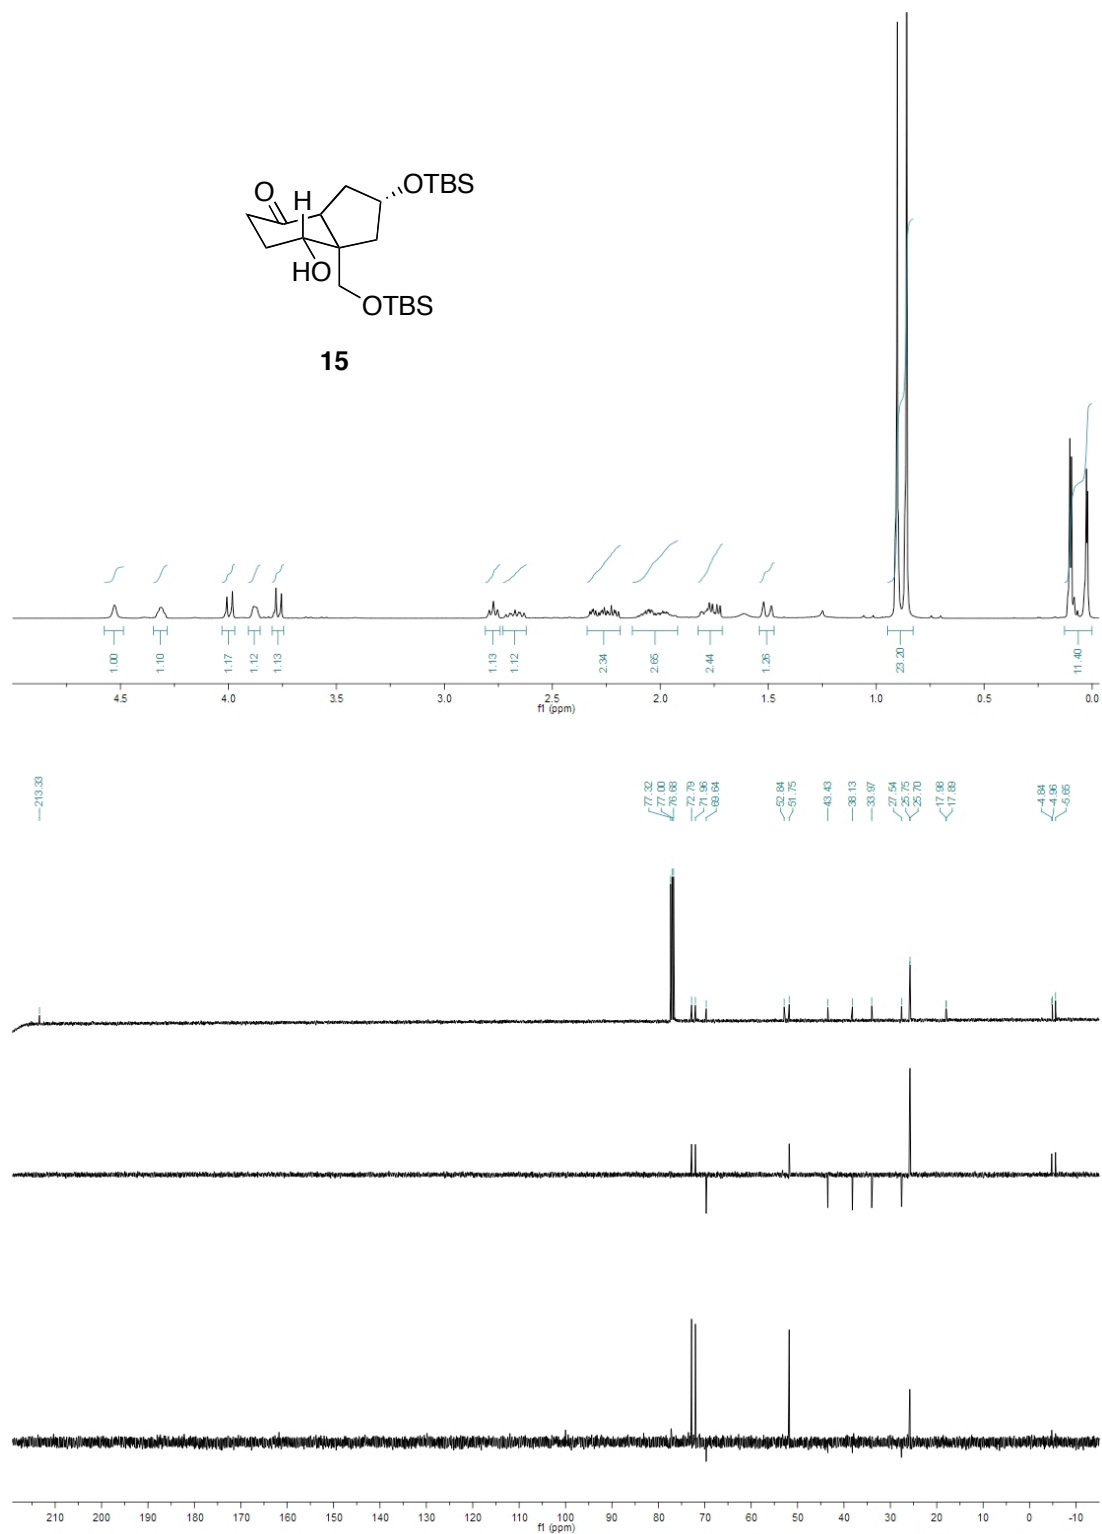

**(2*RS*,3*aSR*,4*SR*,7*RS*,7*aRS*)-2-(*tert*-Butyldimethylsilyloxy)-3*a*-(hydroxymethyl)-2,3,3*a*,4,7,7*a*-hexahydro-1*H*-indene-4,7-diol (**16**)**

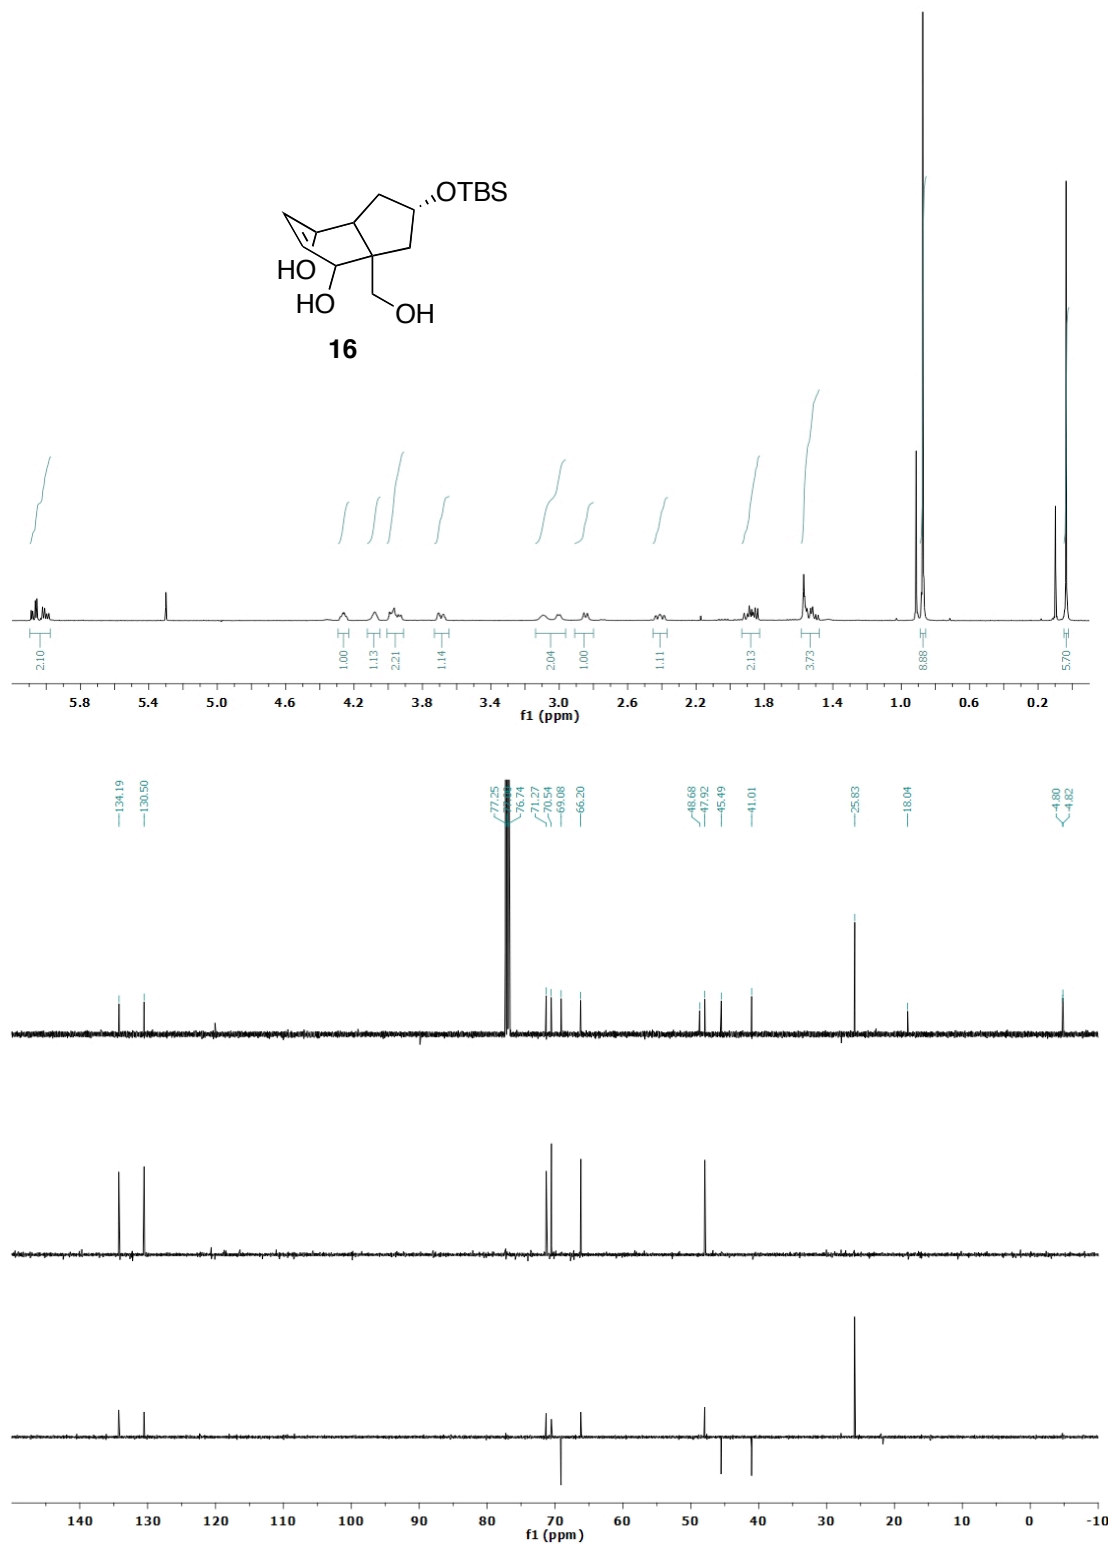

**(*RS*)-1-(1-((*tert*-Butyldimethylsilyloxy)methyl)cyclohexa-2,5-dienyl)-3-chloropropan-2-ol (7)**

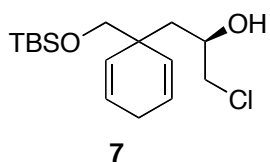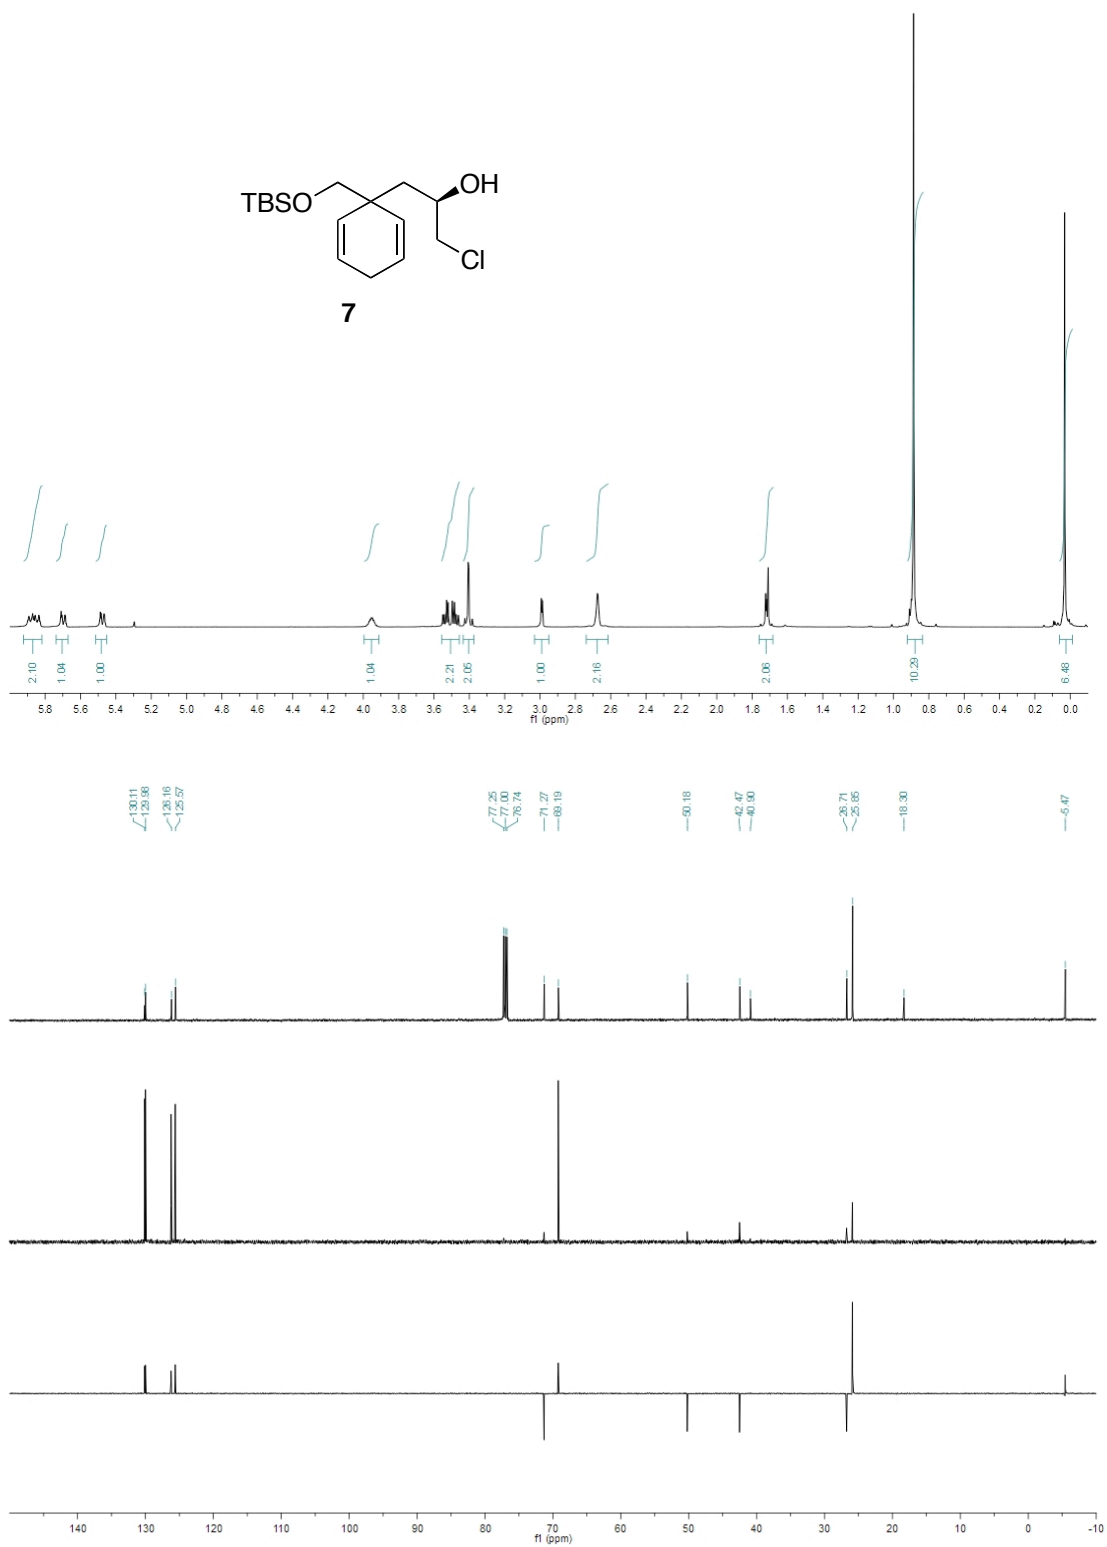

**(2*RS*,3*aRS*,7*aRS*)-7a-((*tert*-Butyldimethylsilyloxy)methyl)-2,3,3*a*,4,5,7*a*-hexahydro-1*H*-inden-2-ol (18)**

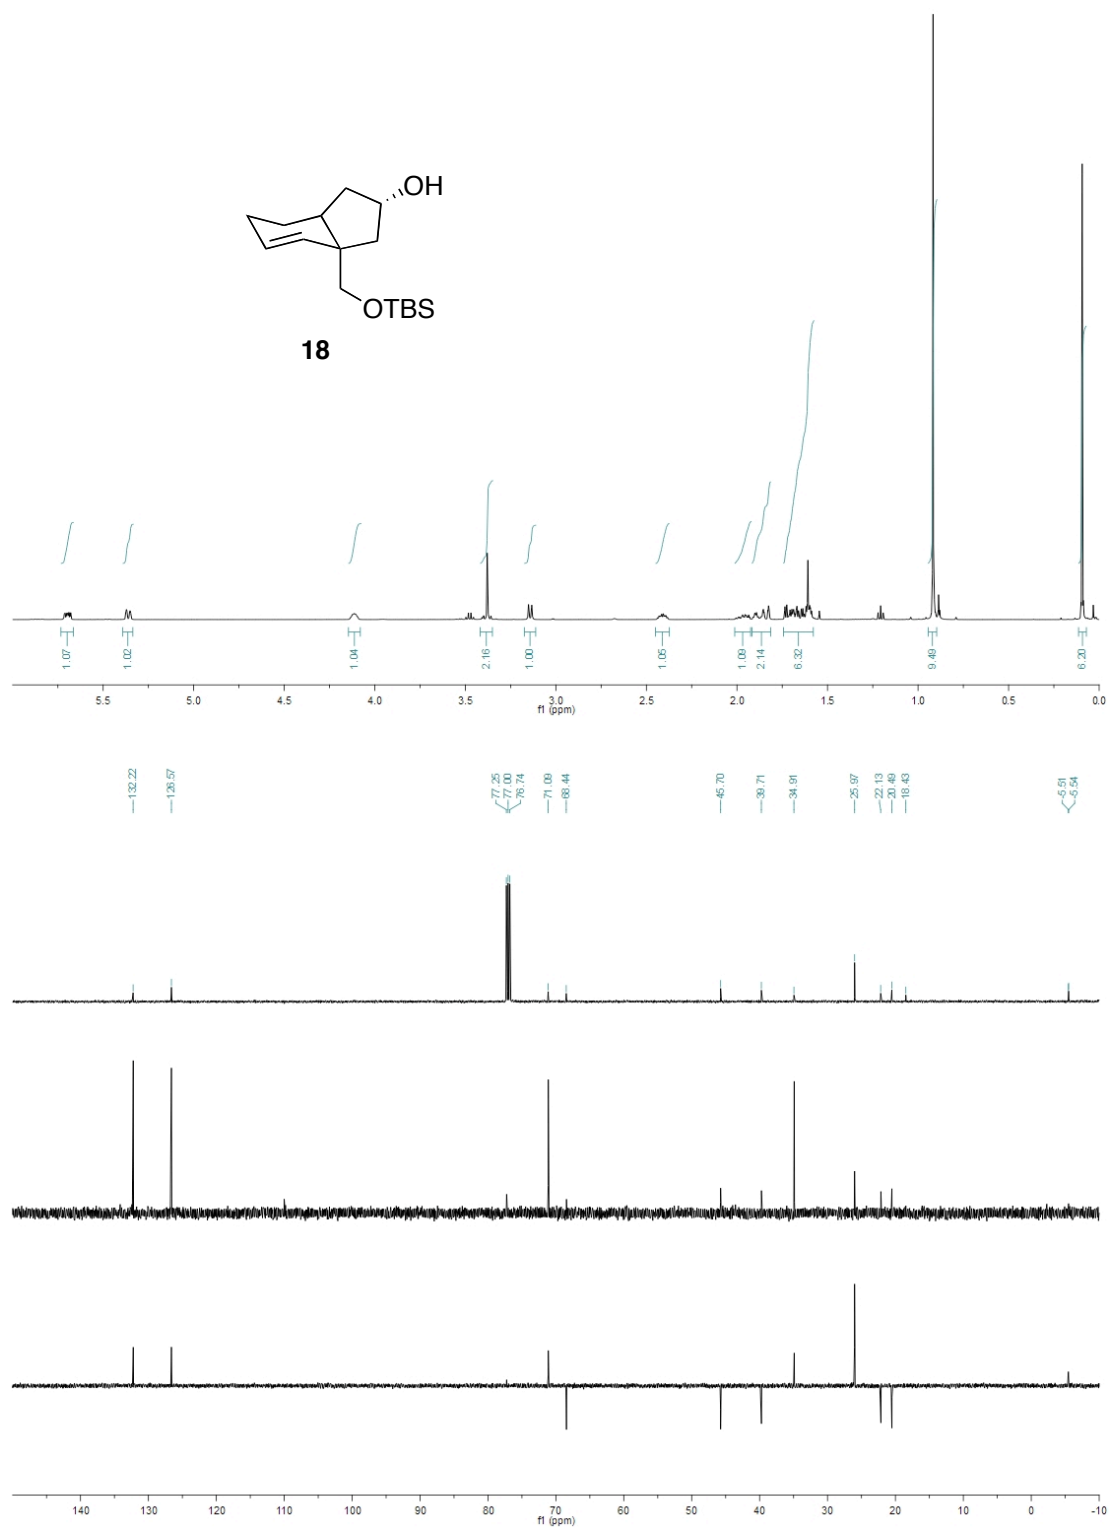

**(2*SR*,3*aRS*,7*aRS*)-7a-((*tert*-butyldimethylsilyloxy)methyl)-2,3,3*a*,4,5,7*a*-hexahydro-1*H*-inden-2-ol (19)**

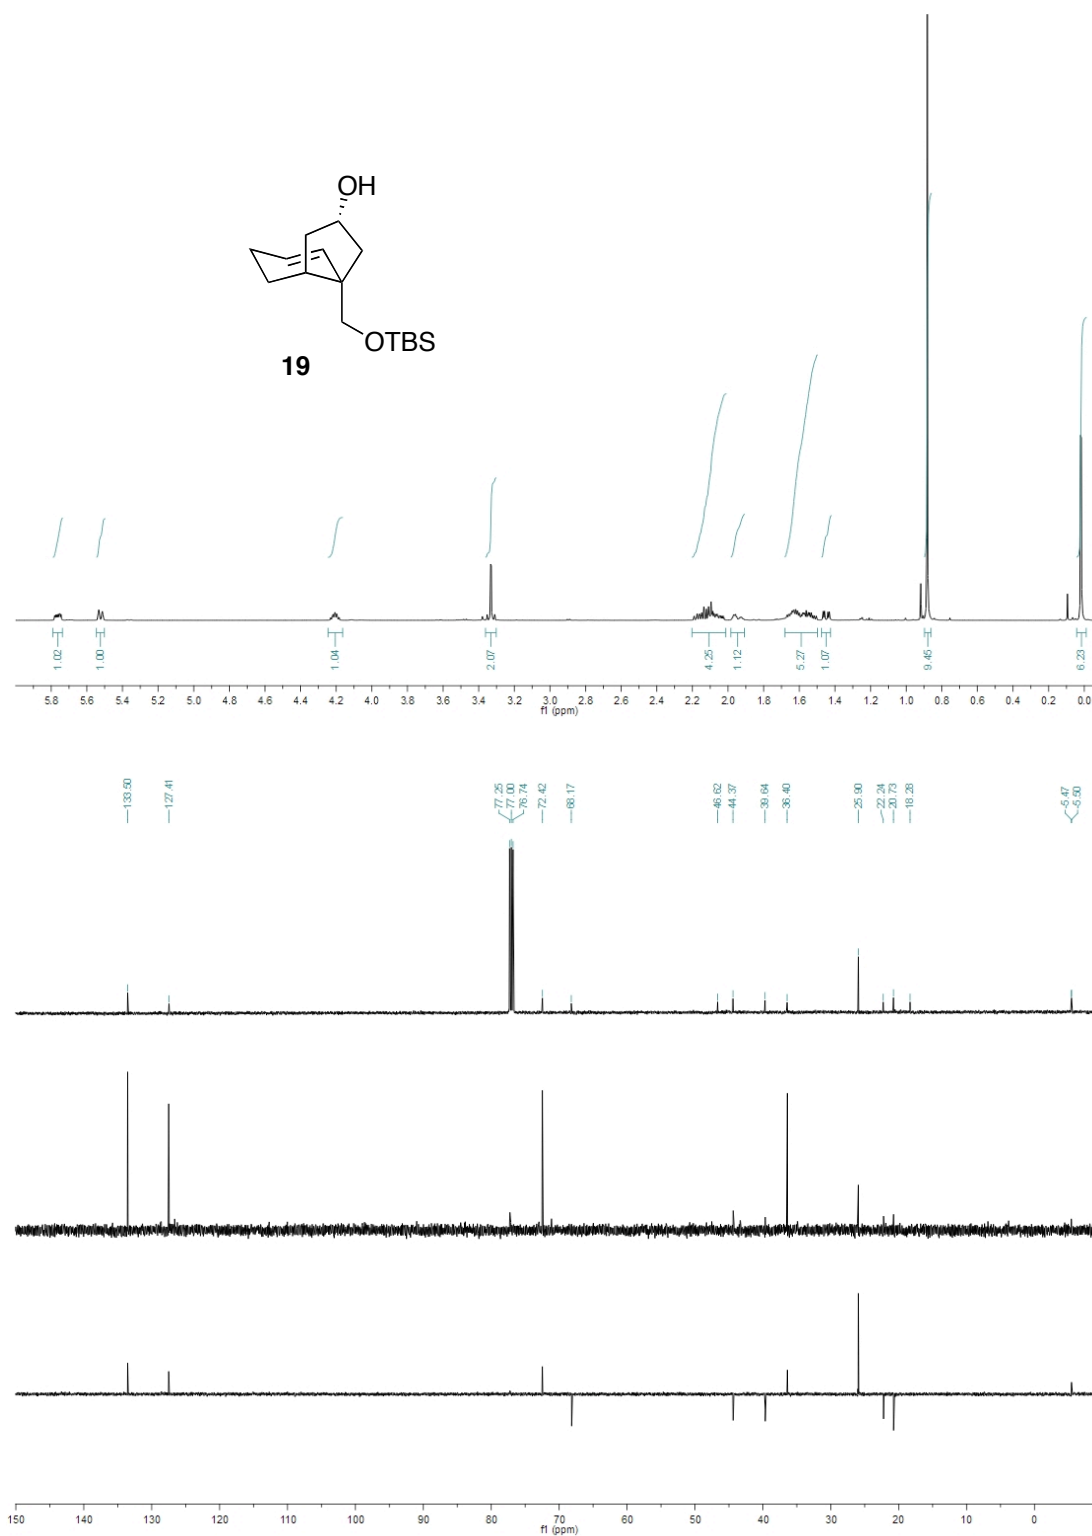

# $^1\text{H}$ - $^1\text{H}$ COSY NMR Spectrum

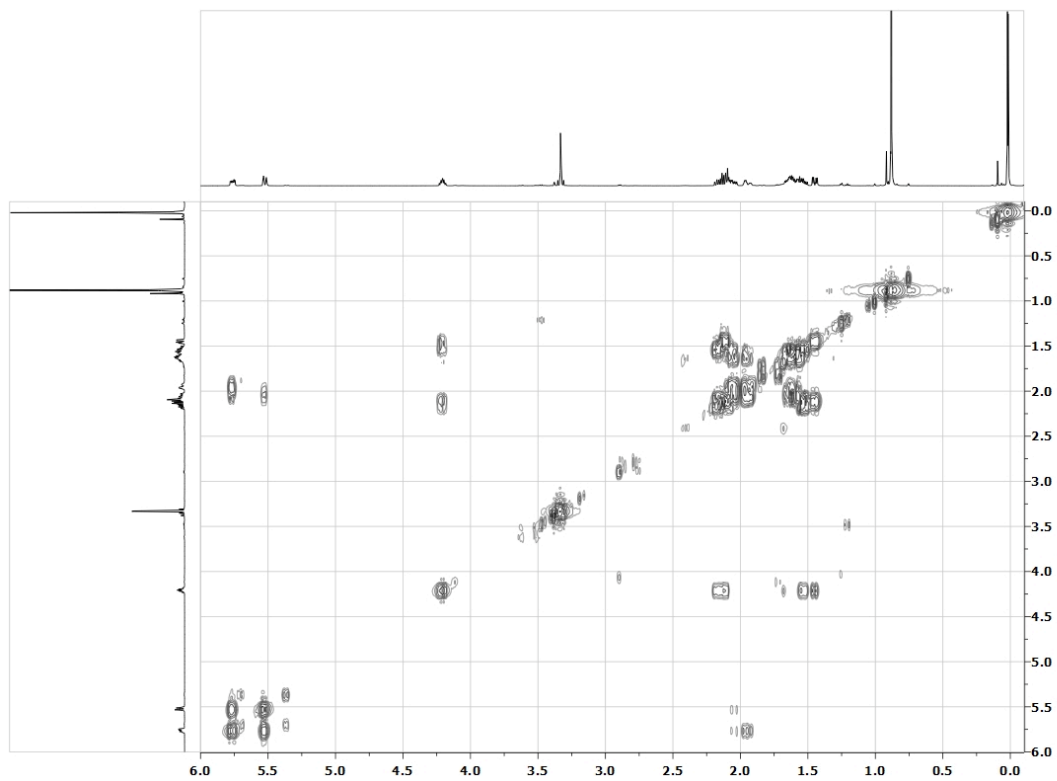

**(1a*SR*,3a*RS*,5*RS*,6a*SR*,6b*RS*)-6a-((*tert*-Butyldimethylsilyloxy)methyl)octahydro-1a*H*-indeno[4,5-*b*]oxiren-5-ol (20)**

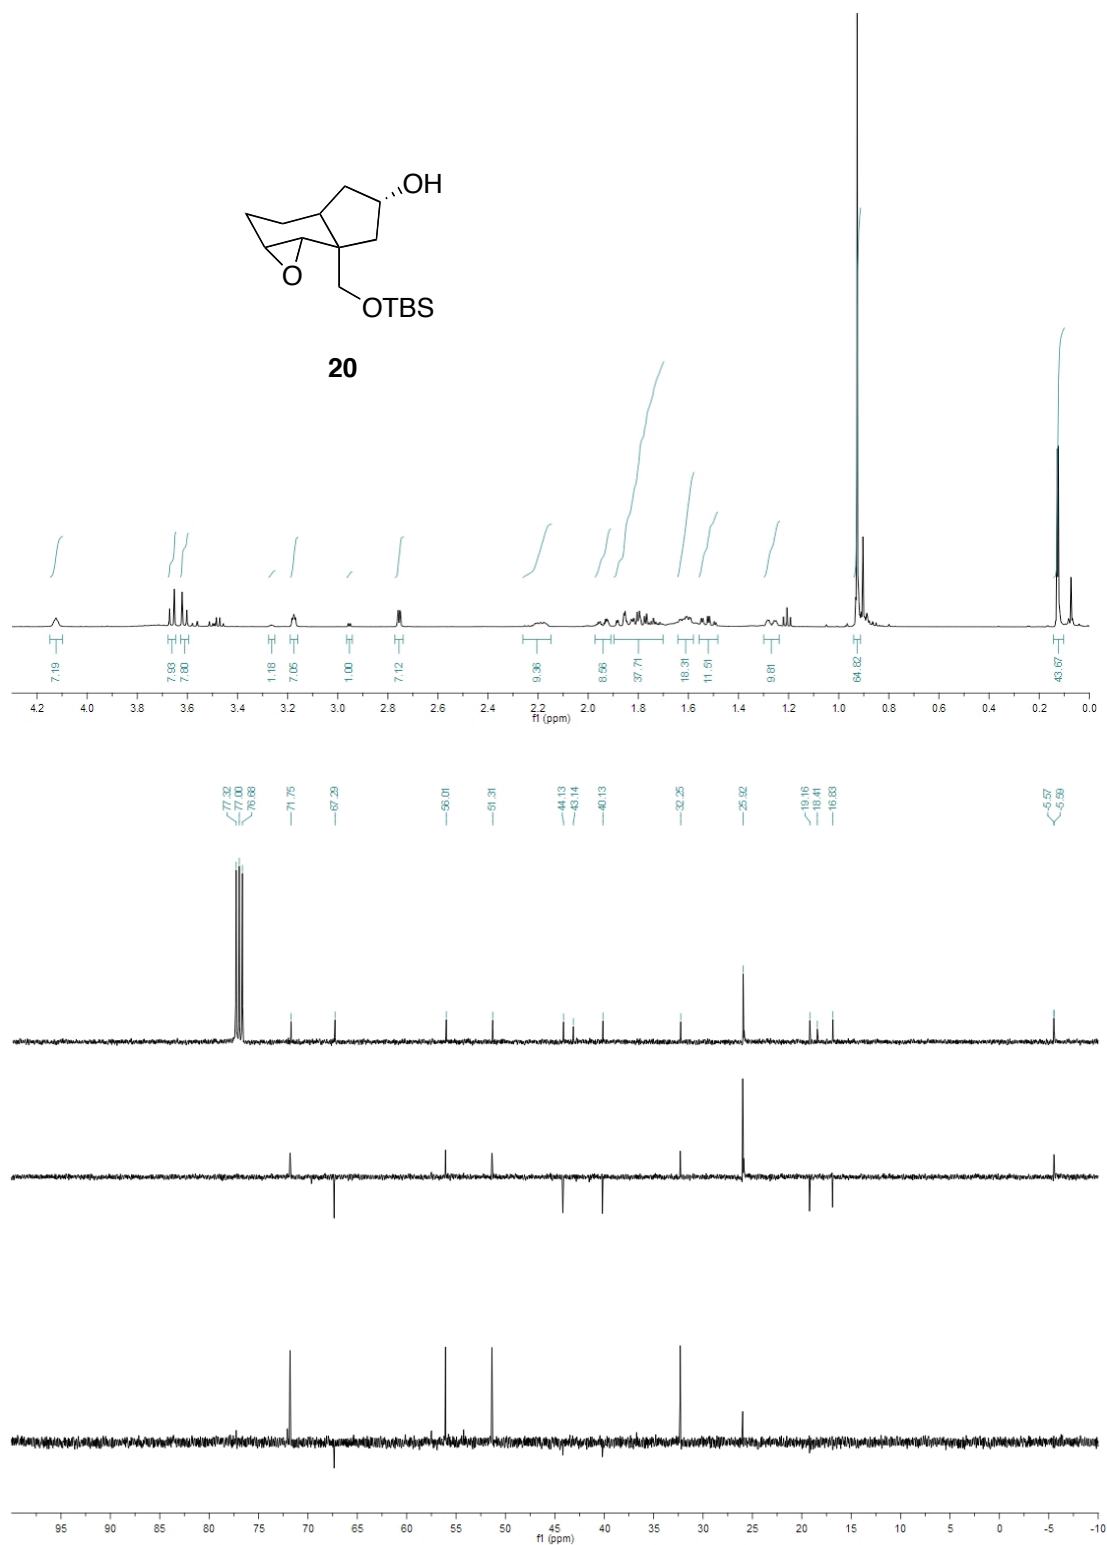

# $^1\text{H}$ - $^1\text{H}$ COSY NMR Spectrum

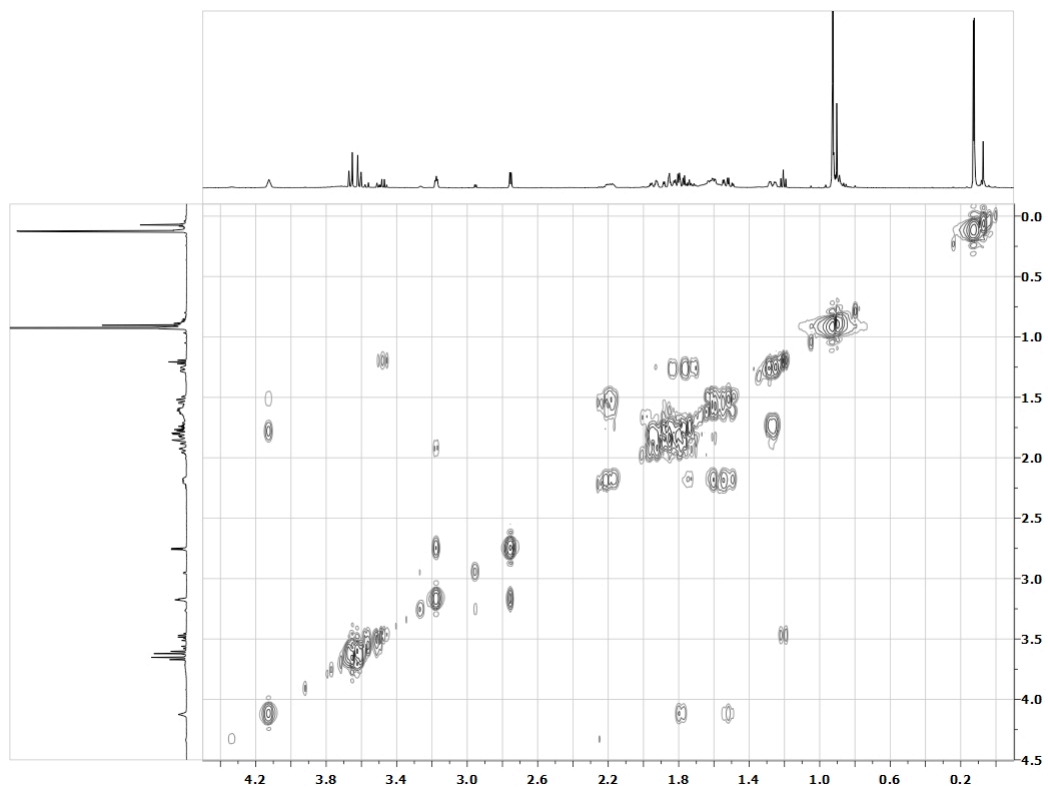



**(2*RS*,3*aSR*,4*SR*,7*aRS*)-3a-((*tert*-Butyldimethylsilyloxy)methyl)-2,3,3a,4,7,7a-hexahydro-1*H*-indene-2,4-diol (21)**

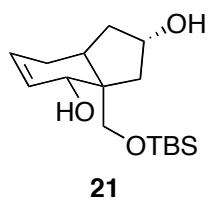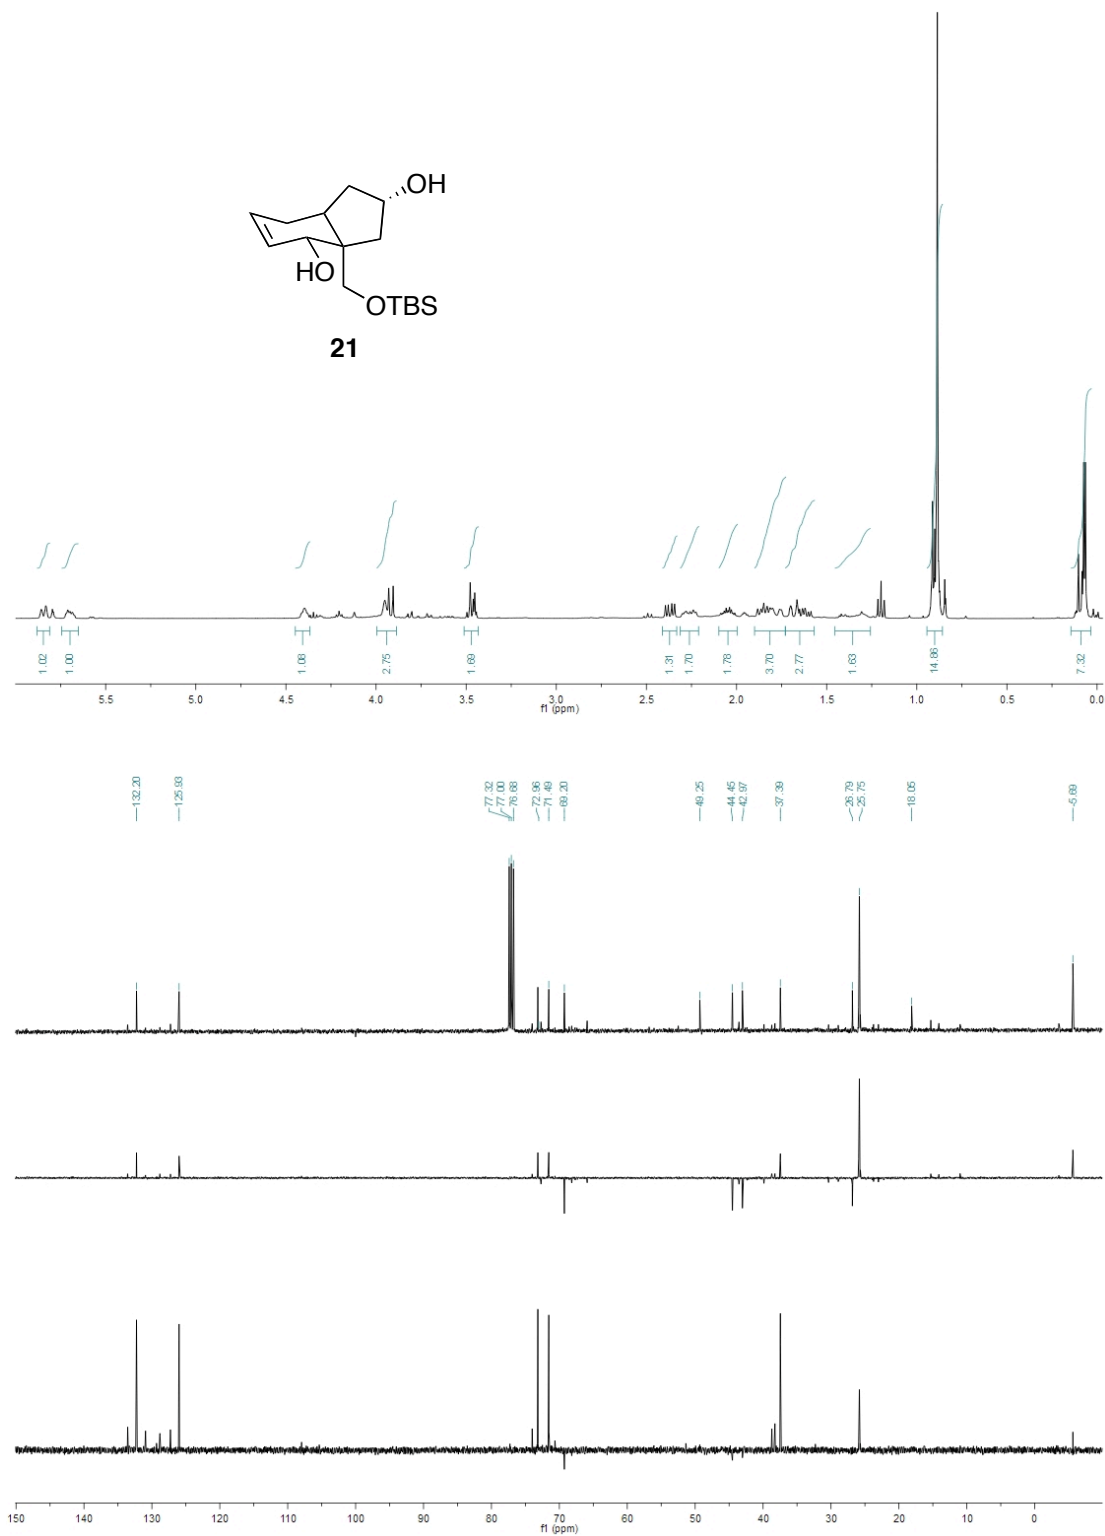

**(2*RS*,3*aSR*,7*aRS*)-3a-((*tert*-Butyldimethylsilyloxy)methyl)-2-hydroxy-3,3*a*,7,7*a*-tetrahydro-1*H*-inden-4(2*H*)-one (22)**

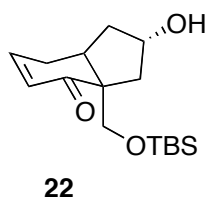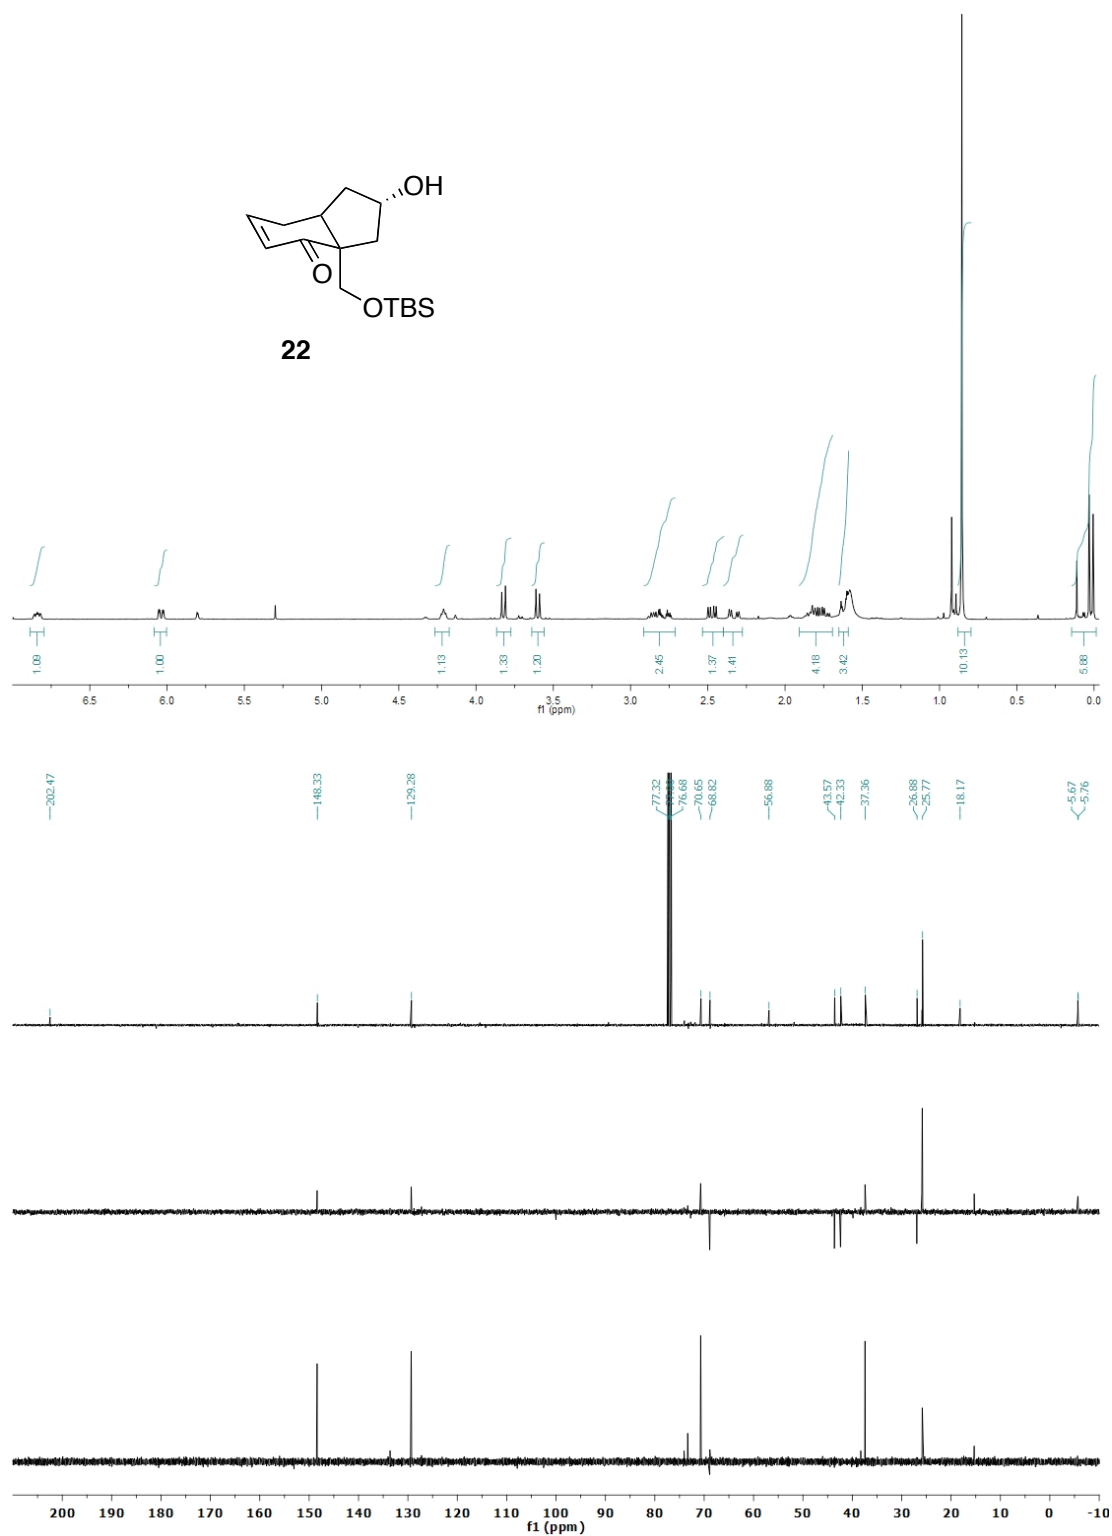

**(2*RS*,3*aSR*,6*SR*,7*aRS*)-3a-((*tert*-Butyldimethylsilyloxy)methyl)-2-hydroxy-6-methylhexahydro-1*H*-inden-4(2*H*)-one (23) and (2*RS*,3*aSR*,6*RS*,7*aRS*)-3a-((*tert*-butyldimethylsilyloxy)methyl)-2-hydroxy-6-methylhexahydro-1*H*-inden-4(2*H*)-one (24)**

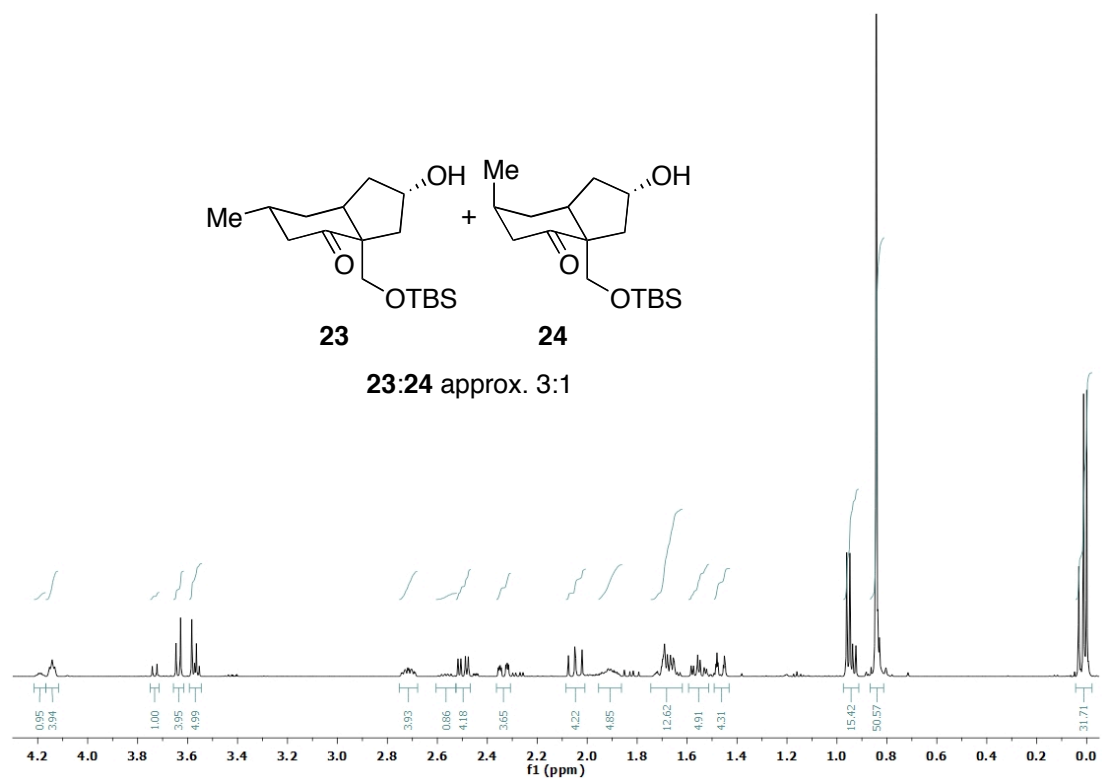

**<sup>1</sup>H-<sup>1</sup>H COSY NMR Spectrum**

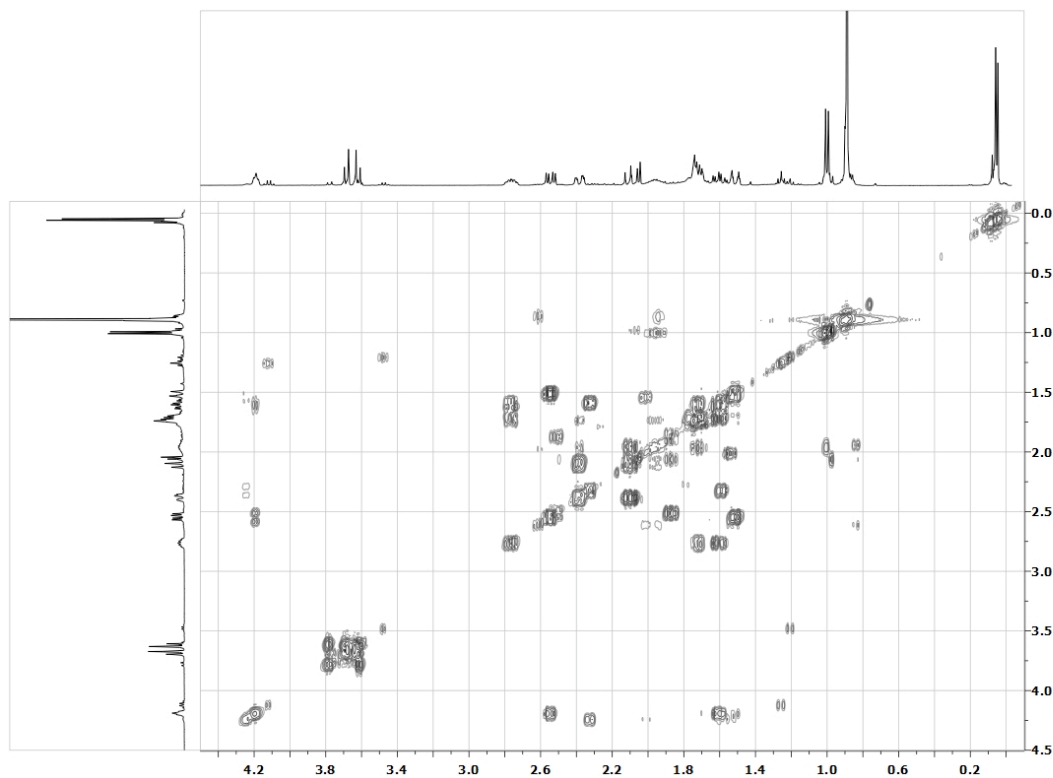

**(9H-Fluoren-9-yl)methyl phenoxycarbonyloxycarbamate (25)**

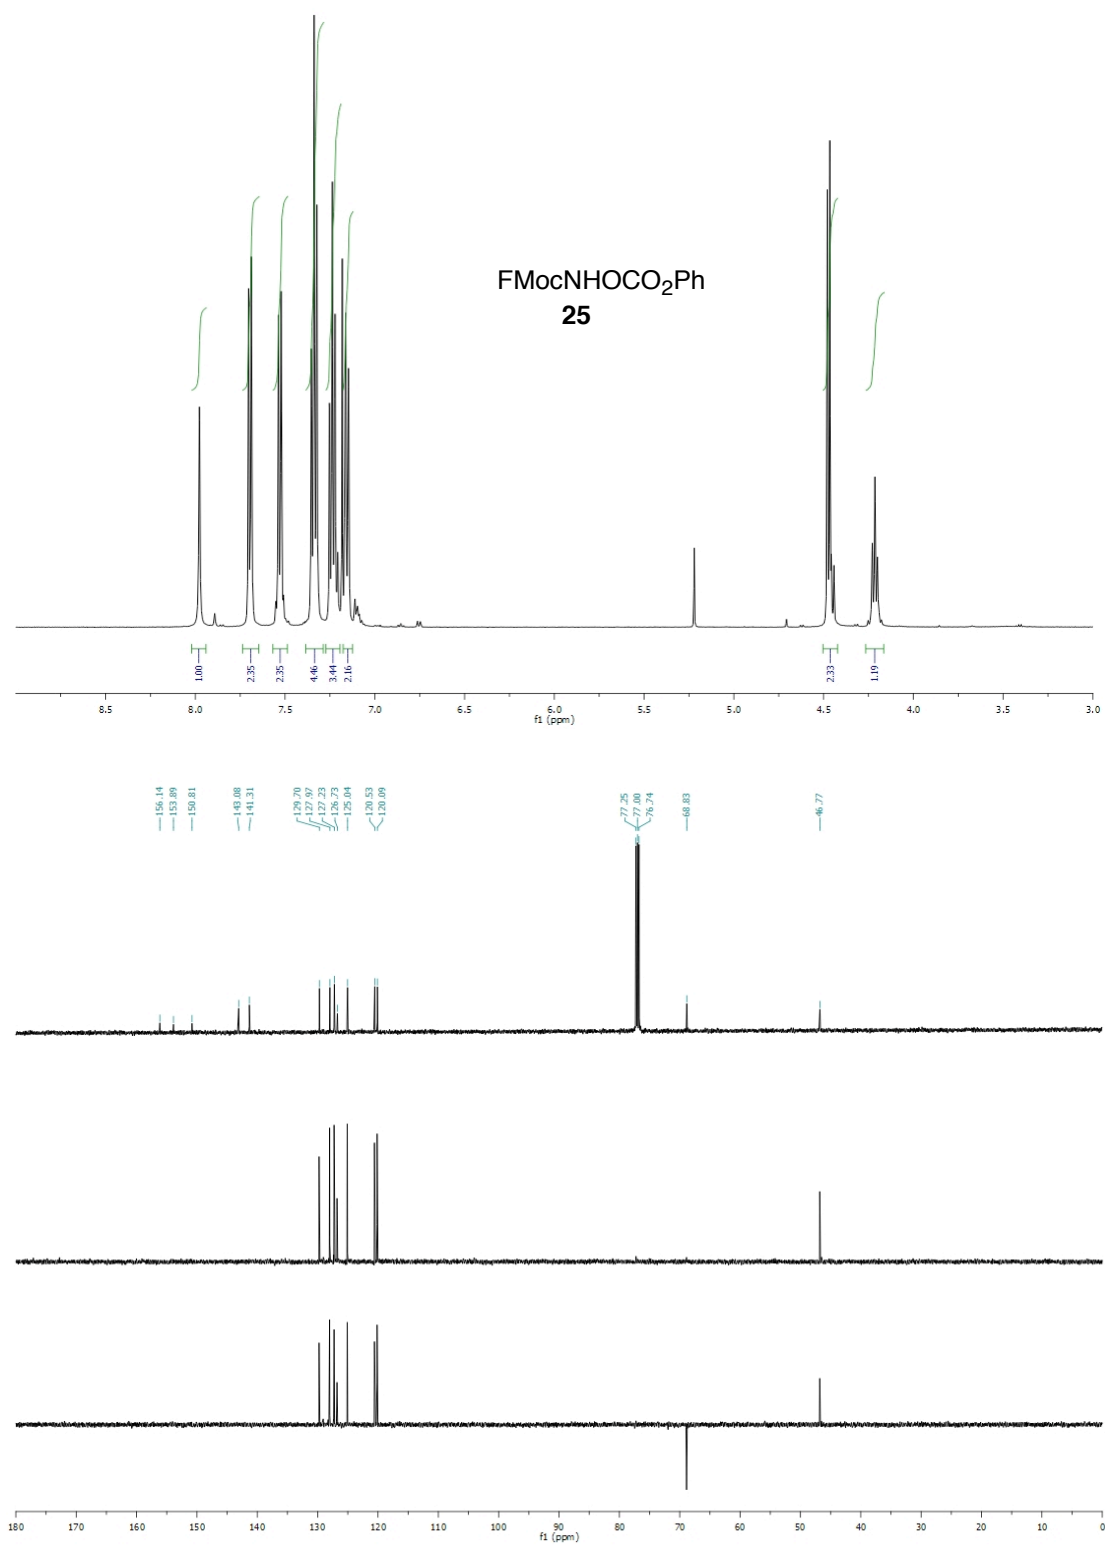

**(9H-Fluoren-9-yl)methyl (2SR,3aSR,6SR,7aRS)-3a-((tert-butyltrimethylsilyloxy)methyl)-6-methyl-4-oxooctahydro-1H-inden-2-yl(phenoxy-carbonyloxy)carbamate (26)**

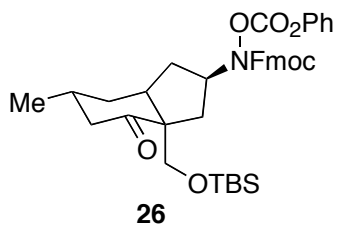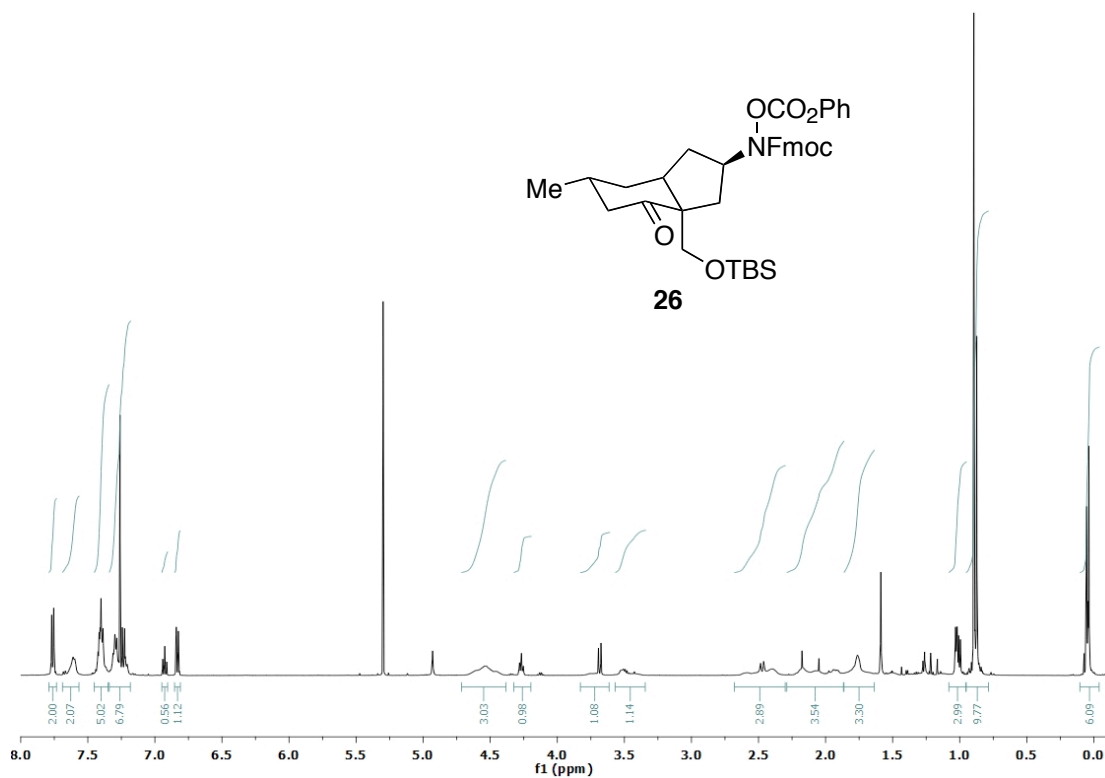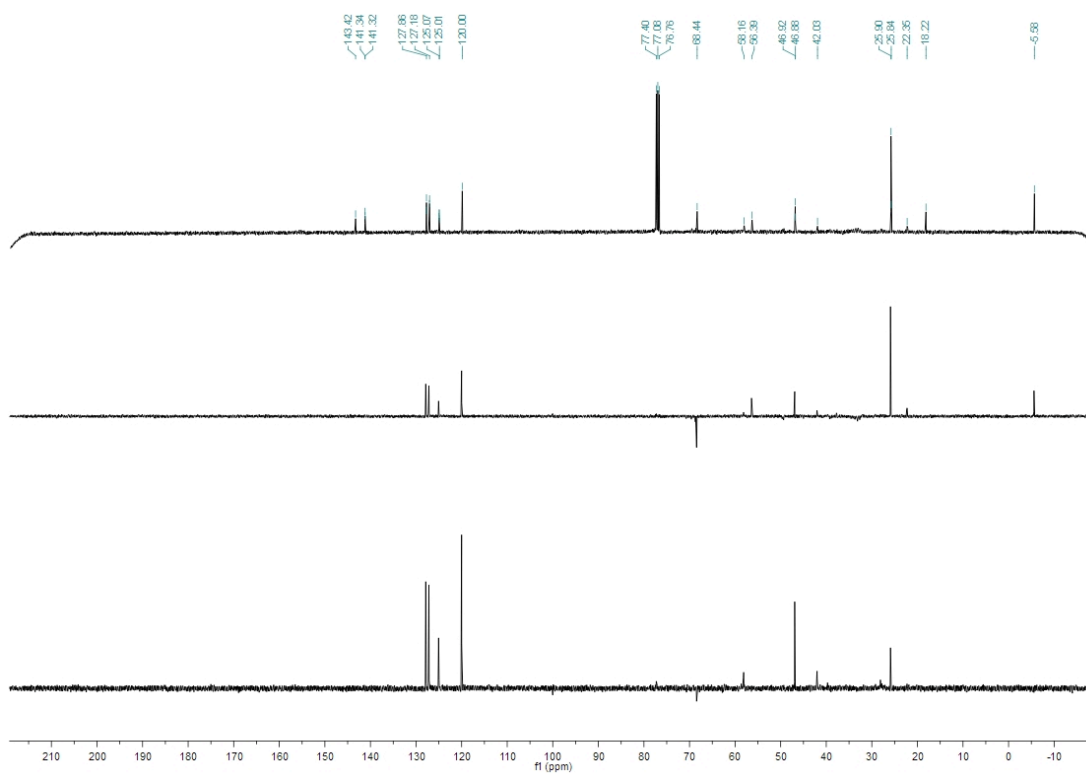

# Carbonate 8

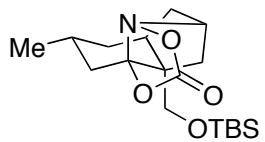

**8**

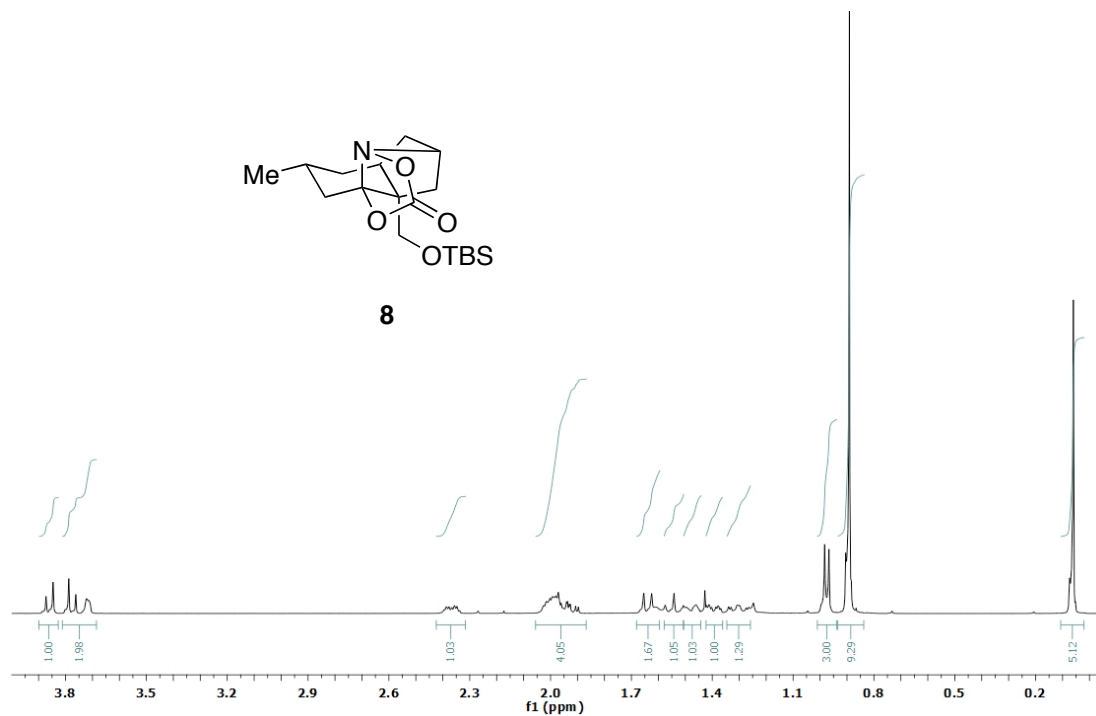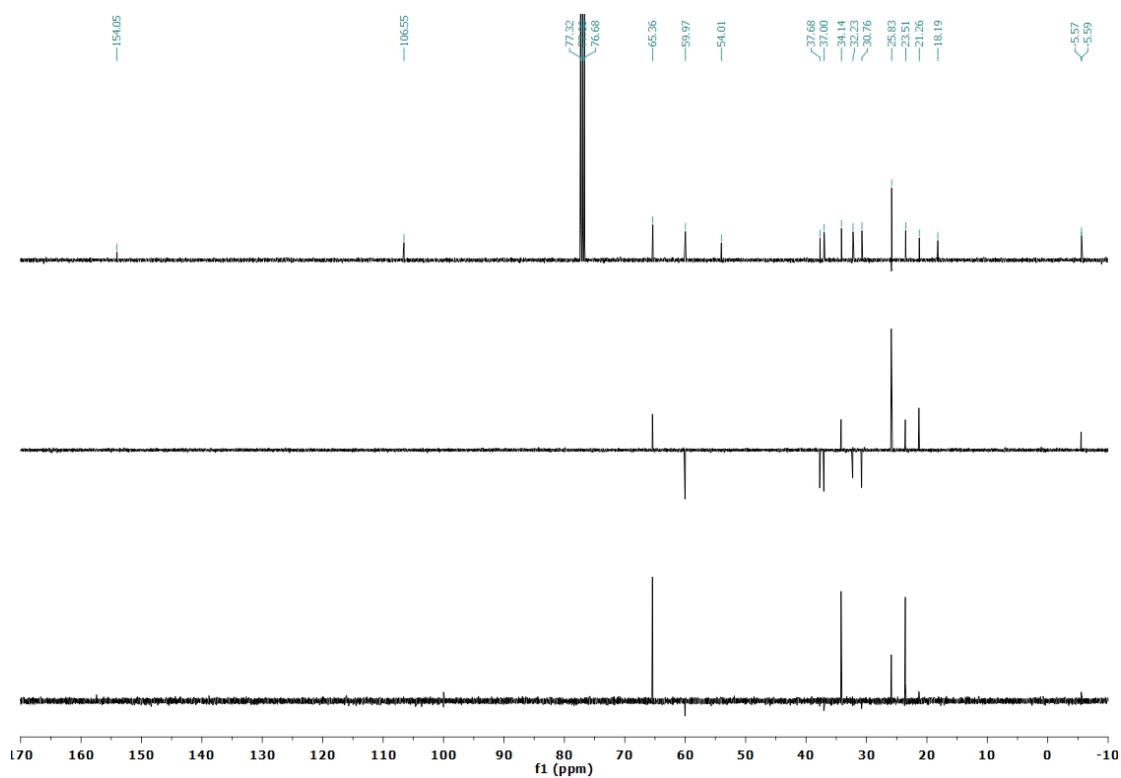

# $^1\text{H}$ - $^1\text{H}$ COSY NMR Spectrum

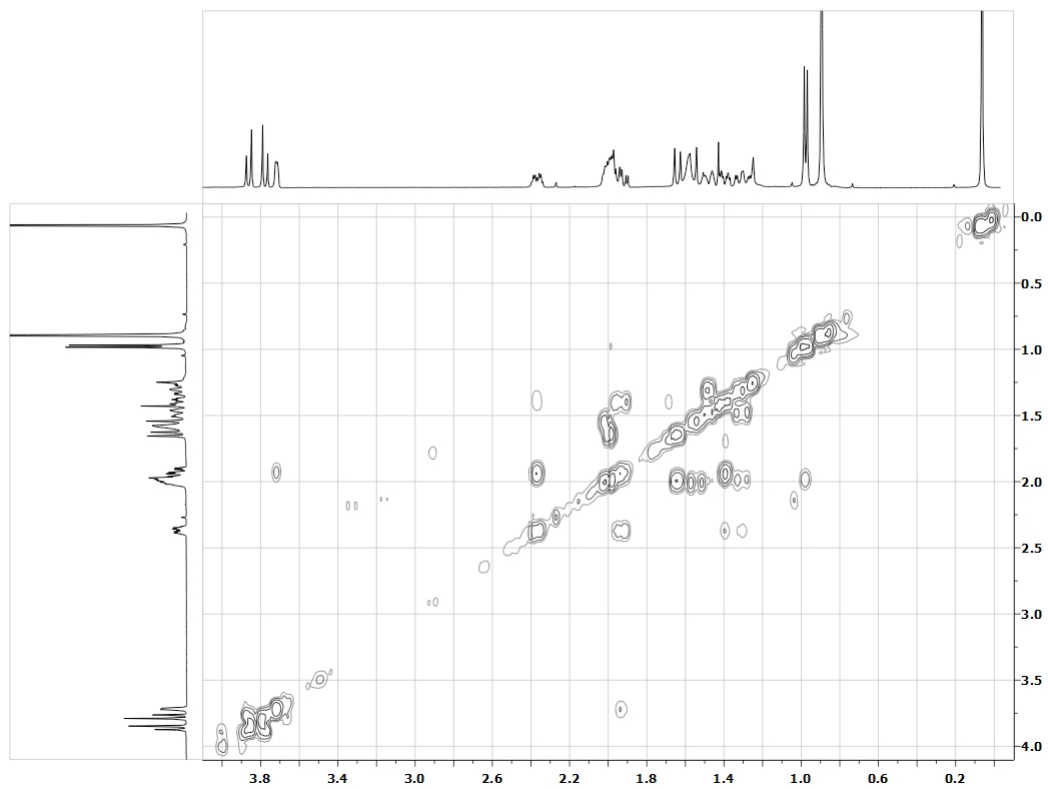

Supplement: b909860g.pdf [file b909860g.pdf]
